# Supplementary material for: Exploring the Fundamental Dynamics of Error-Based Motor Learning Using a Stationary Predictive-Saccade Task
Source: PLoS One. 2011 Sep 23;6(9):e25225. doi: 10.1371/journal.pone.0025225 (PMC3179473; doi:10.1371/journal.pone.0025225)
Supplement: Methods S1 — ARFIMA models. (DOC) [file pone.0025225.s001.doc]

**Supplemental Methods: ARFIMA models**

Traditionally, motor learning has been modeled using state-space models, which describe learning as the updating of a state vector containing a discrete set of information regarding prior performance and current stimulus information. All state-space models have corresponding Autoregressive Moving-Average (ARMA) models [1]; that is, there exists some simple linear transformation to express a state-space model as an ARMA model [2]. This transformation is non-unique, such that a single ARMA model may be rewritten as a number of different state-space models. Nevertheless, the dynamics and statistics of these models are identical; both the state-space model and its ARMA counterpart will exhibit the same (exponential) decay of inter-trial correlations as expressed in the ACF and power spectrum.

An ARMA(*p*,*q*) model assumes that a time series may be described by two independent processes acting upon a white noise process. There is a *p*th order autoregressive (AR) process that uses the previous *p* observations *Xt-p*,…,*Xt-1* and the current noise term *et* to generate the next point in the time series *Xt*, added to a *q*th order moving-average (MA) process that uses the last *q* noise terms *et-q*,…,*et-1* to generate the next observation. This yields an ARMA(*p*,*q*) process of the form:

(Eqn. 1)

where the and the are constant coefficients. An ARMA process only models short-term correlations in a time series, limited by the extent over which prior observations and noise terms are explicitly incorporated. To exhibit inter-trial correlations that decay more slowly than an exponential rate, it is necessary to turn to a different class of models.

The ARFIMA(*p*,*d*,*q*) model is a combination of the standard ARMA(*p*,*q*) model [1], which describes a process exhibiting short-term correlations, and a fractional differencing parameter, *d*, which gives the model its long-range dependence. Eqn. 1 can be re-written using the backward shift operator *B*, defined as *BXt* = *Xt*-1, as a polynomial in *B* with coefficients and the :

, (Eqn. 2)

where powers of *B* indicate a corresponding number of shifts backward in the time series. Note that using *B*, we can express the differencing of successive terms in the time series as (1-*B*)*Xt*; raising (1-*B*) to the *d*th power is equivalent to repeatedly differencing the time series *d* times. If *d* is a fraction in the range 0 < ≤ 0.5, we then have the fractional differencing operator defined using the binomial expansion by:

, (Eqn. 3)

where Γ is the gamma function [3-4]. Thus, we can express an ARFIMA model as:

. (Eqn. 4)

The fractional integration gives the model its long-range dependence [5]; thus, an ARFIMA model exhibits the expected power-law type decay of the autocorrelation function that marks it as having long-term correlations. ARFIMA models with *d* values greater than zero are persistent – small values tend to be followed by small values and large values tend to be followed by large values – while *d* values less than zero produce anti-persistent processes that tend to fluctuate highly. This model provides a neat and compact form for expressing the complexities of a process exhibiting long-range dependence. Since fractional integration requires keeping track of all data points in a time series to an infinite time in the past, however, the computations for simulating or modeling an ARFIMA process can be quite unwieldy.

**References**

1. Box GEP, Jenkins GM (1970) Time series analysis: forecasting and control. Oakland: Holden-Day.

2. Akaike H (1974) Markovian representation of stochastic proceses and its application to analysis of autoregressive moving average processes. Ann Inst Statist Math 26: 363-387.

3. Hosking JRM (1981) Fractional Differencing. Biometrika 68: 165-176.

4. Beran J (1994) Statistics for long-memory processes. New York: Chapman & Hall.

5. Granger CWJ, Joyeux R (1980) An introduction to long-range time series models and fractional differencing. J Time Series Analysis 1: 15-29.
